# Supplementary material for: HSPA12A controls cerebral lactate homeostasis to maintain hippocampal neurogenesis and mood stabilization
Source: PubMed Central journal article supplement (PMC10425330; doi:10.1038/s41398-023-02573-5), 2023-08-14
Supplement: 41398_2023_2573_MOESM2_ESM.pdf [file 41398_2023_2573_MOESM2_ESM.pdf]

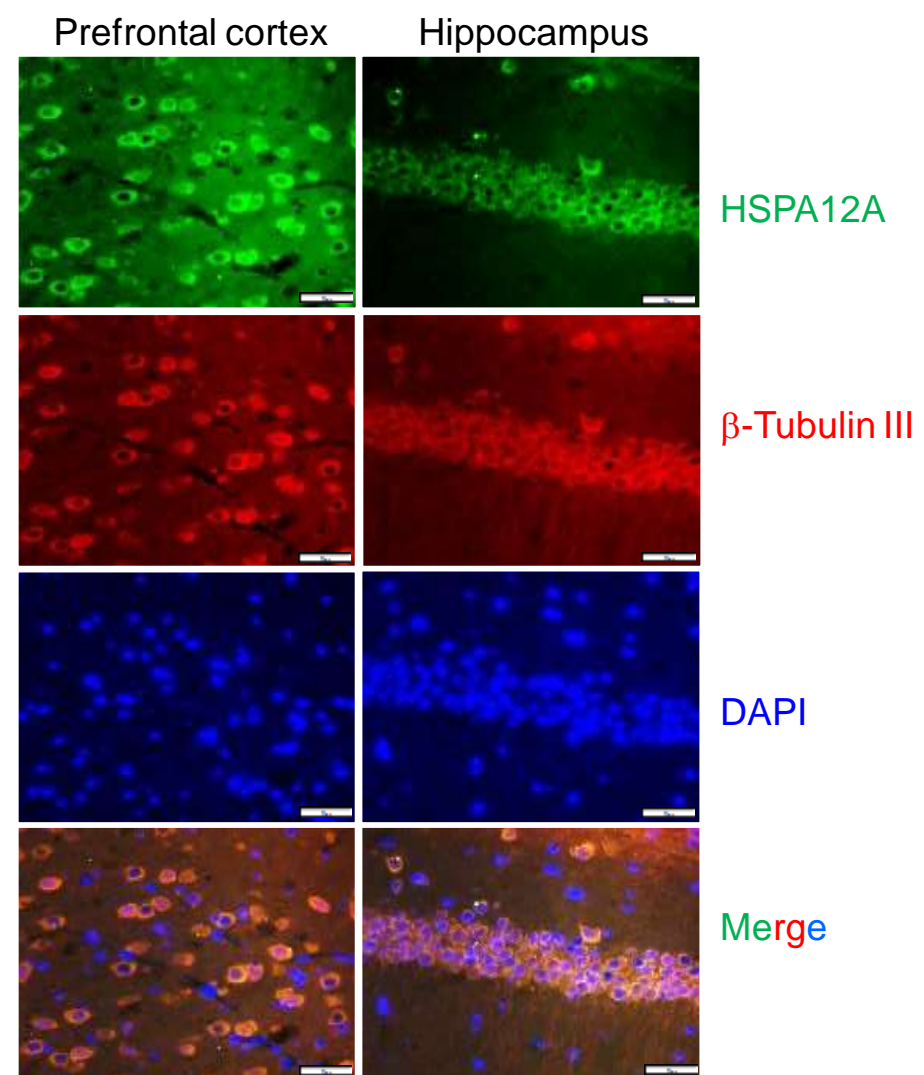

**Figure S1**

**A**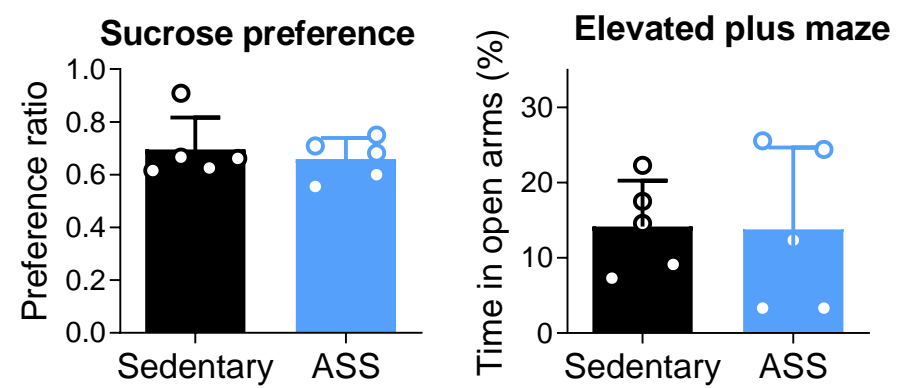**B**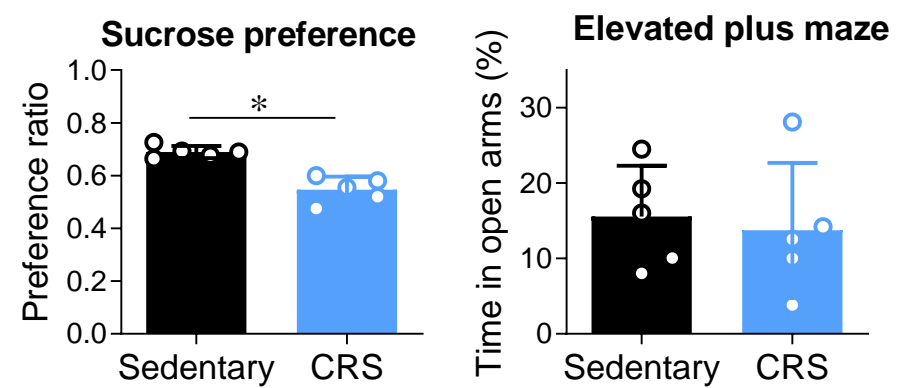**C**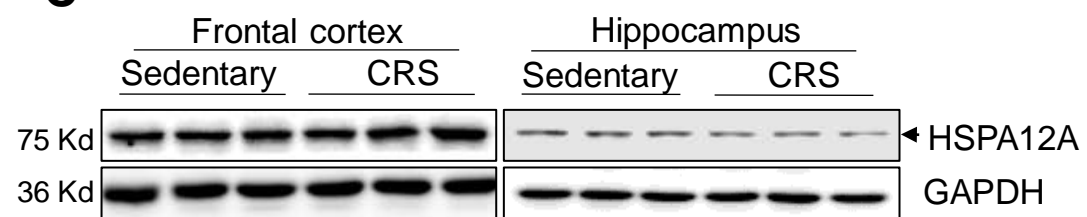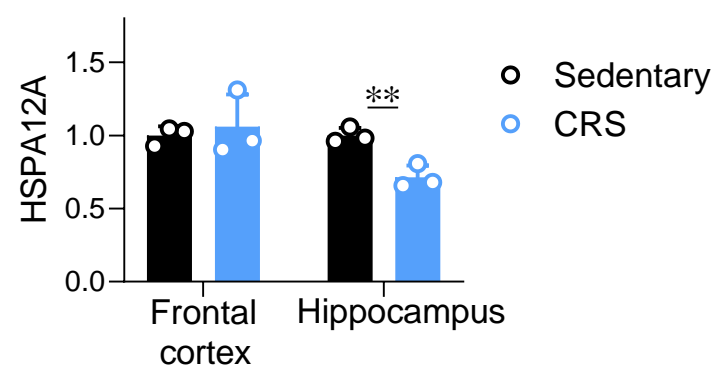**D**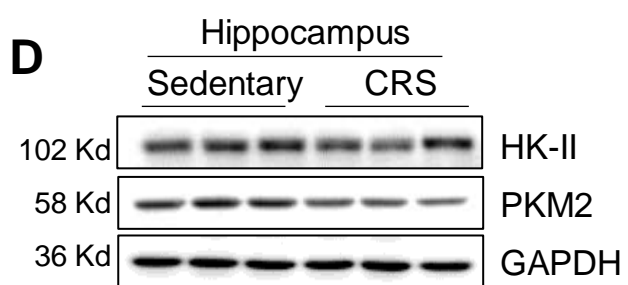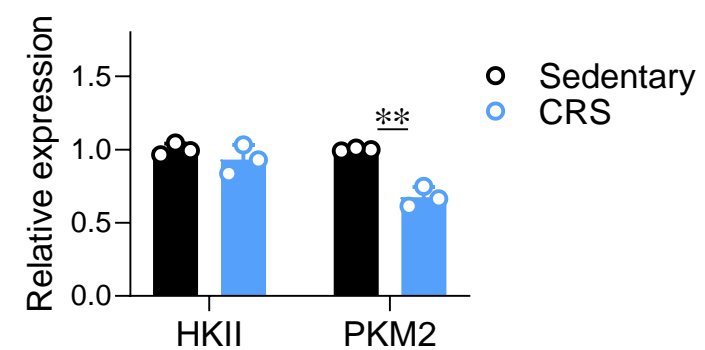**E**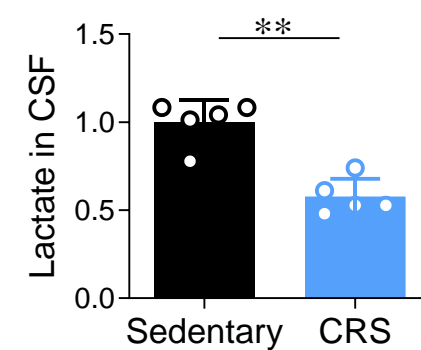**Figure S2**

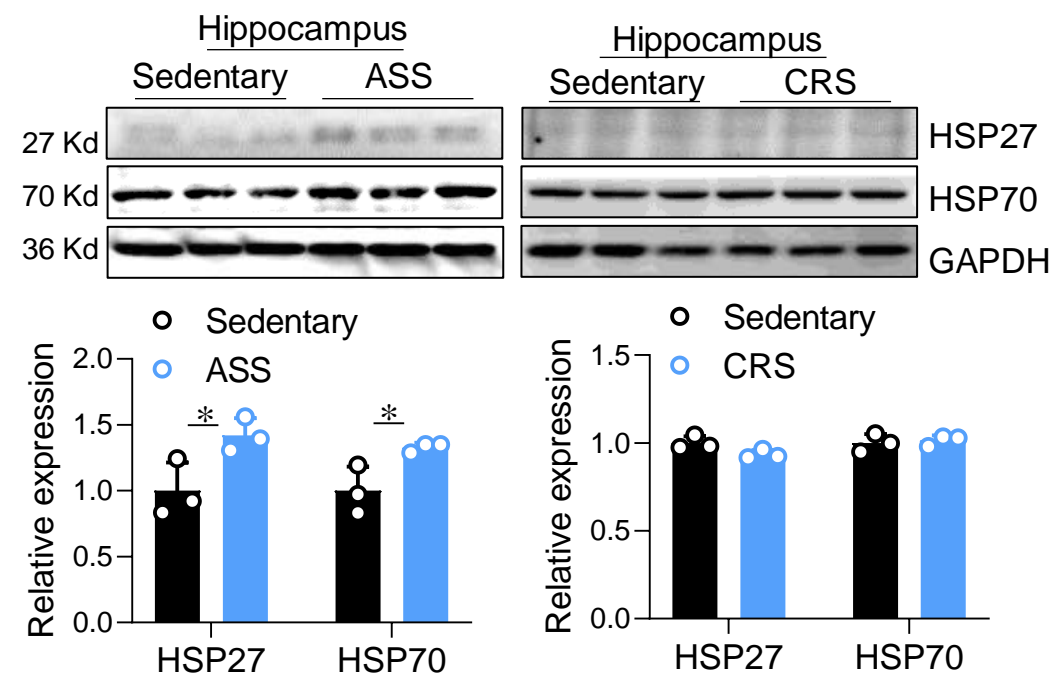

Figure S3

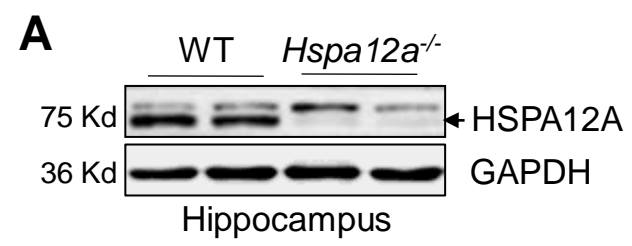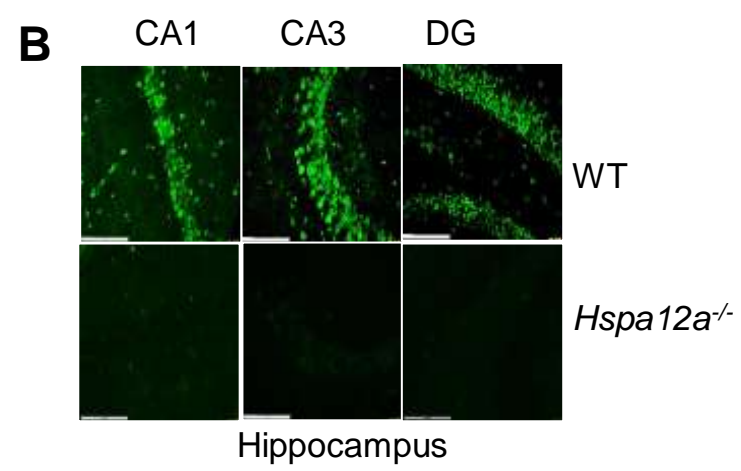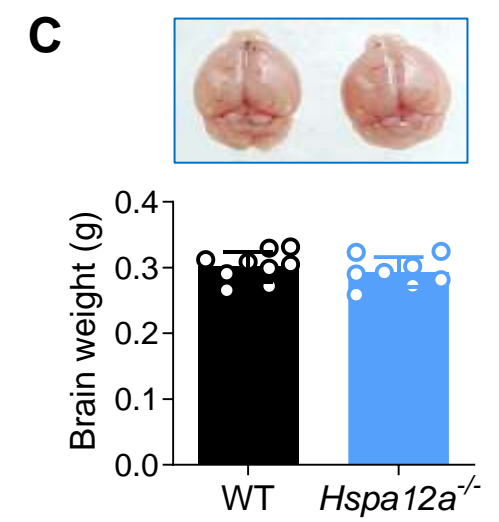

**Figure S4**

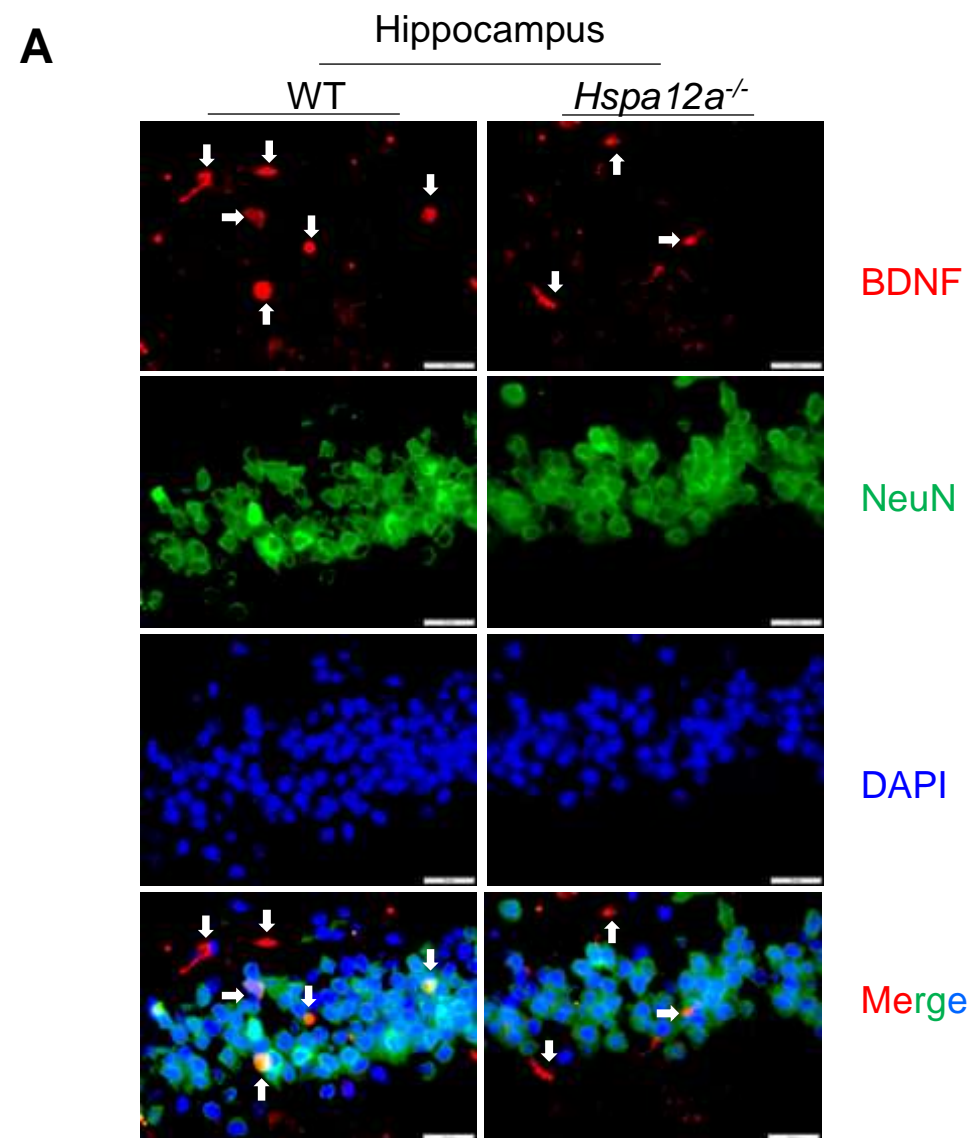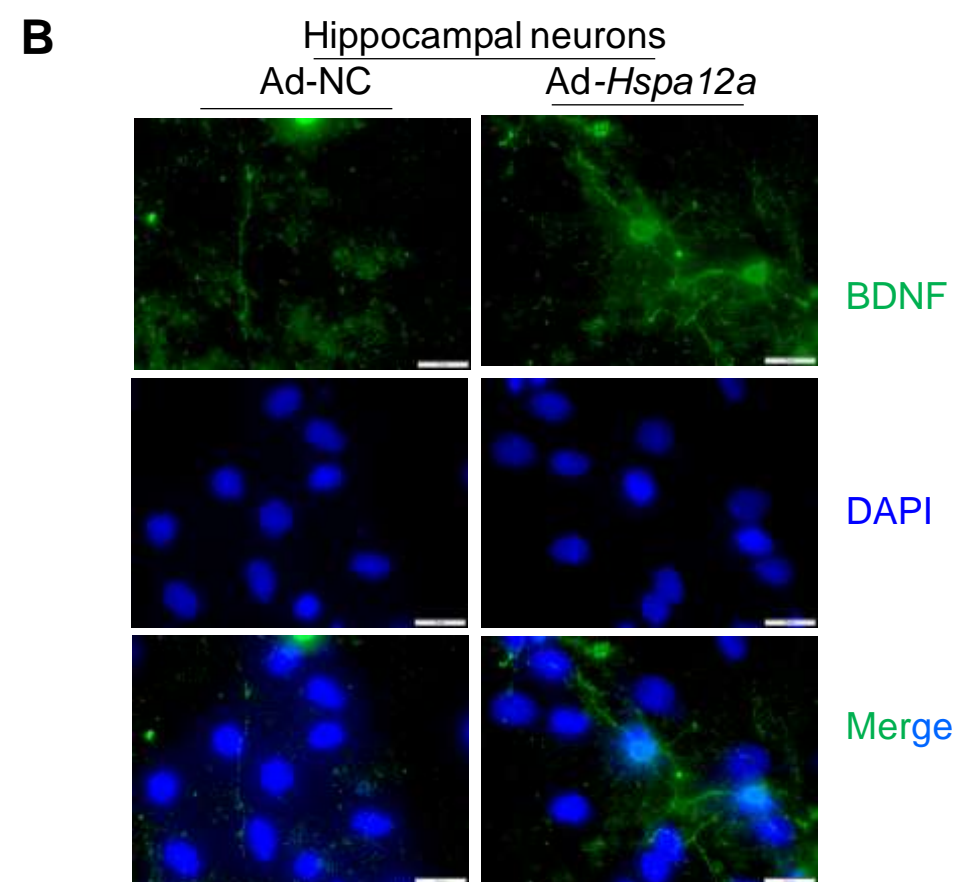

Figure S5

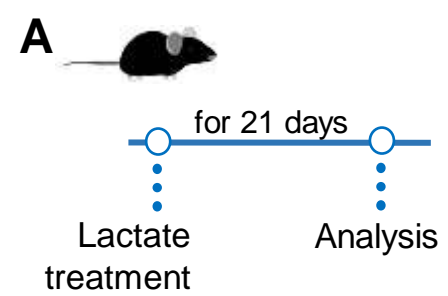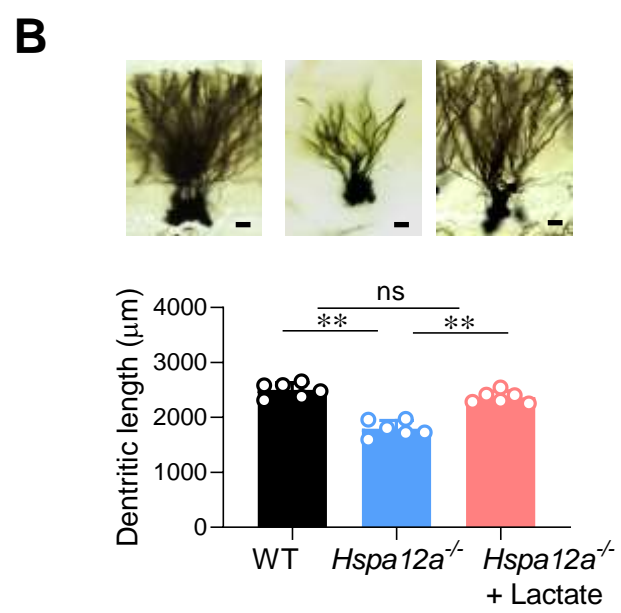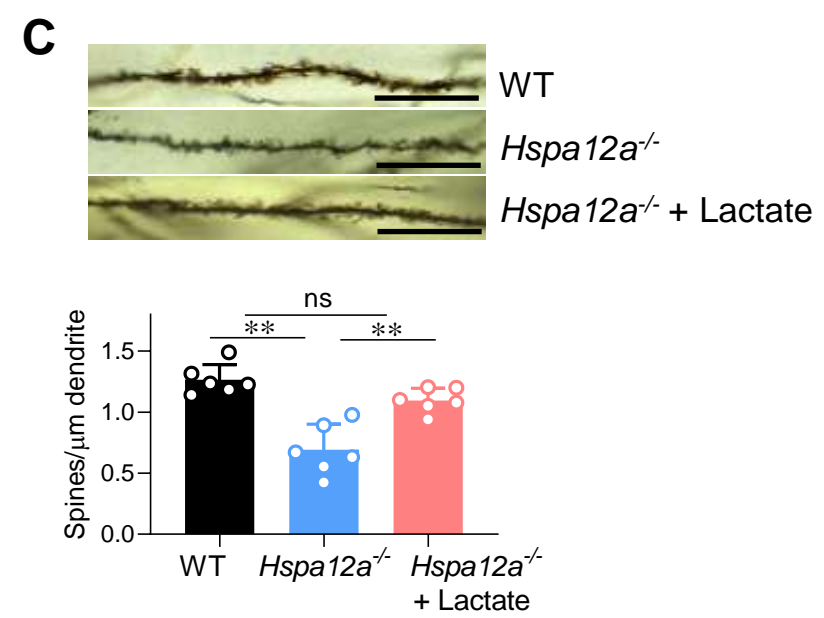

**Figure S6**

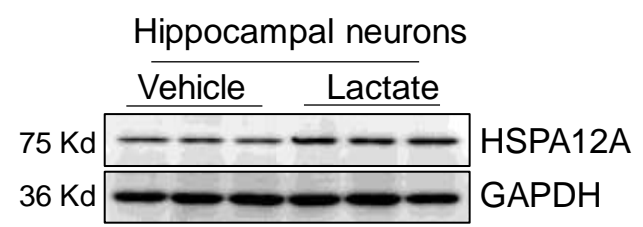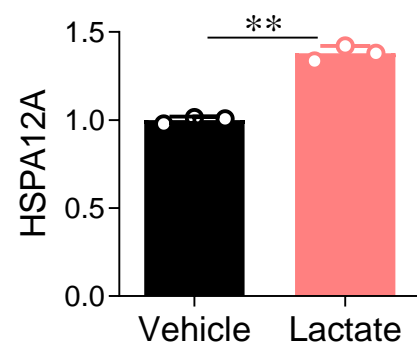

**Figure S7**

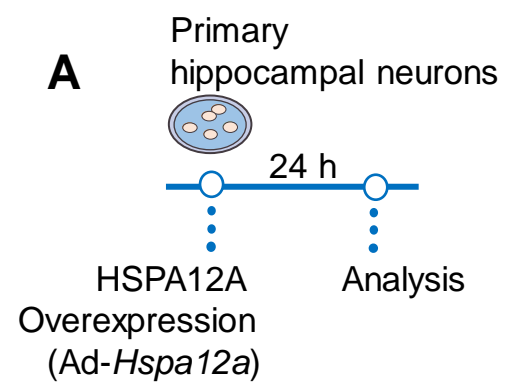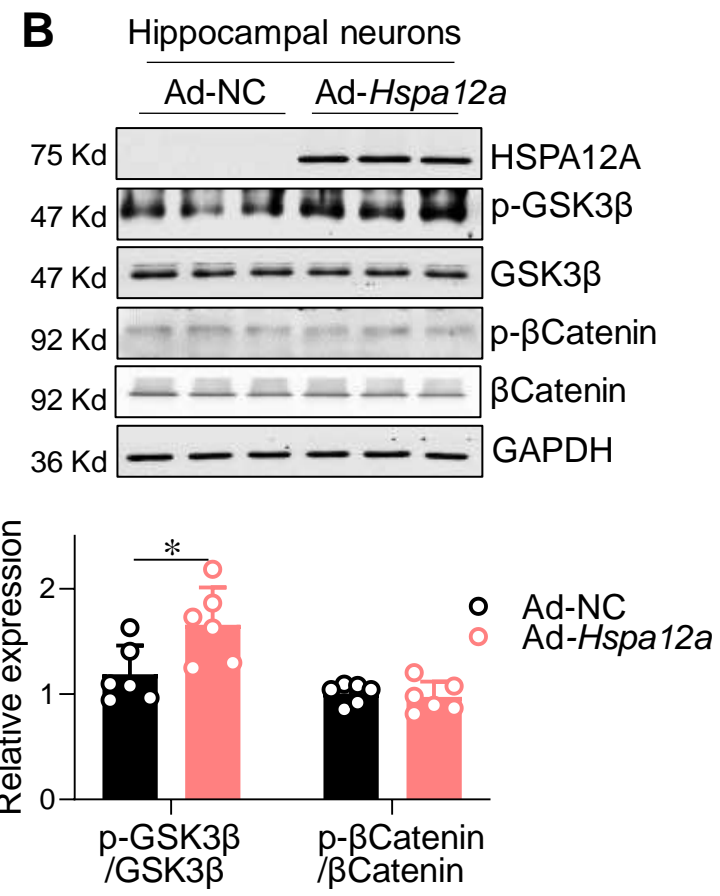

**Figure S8**



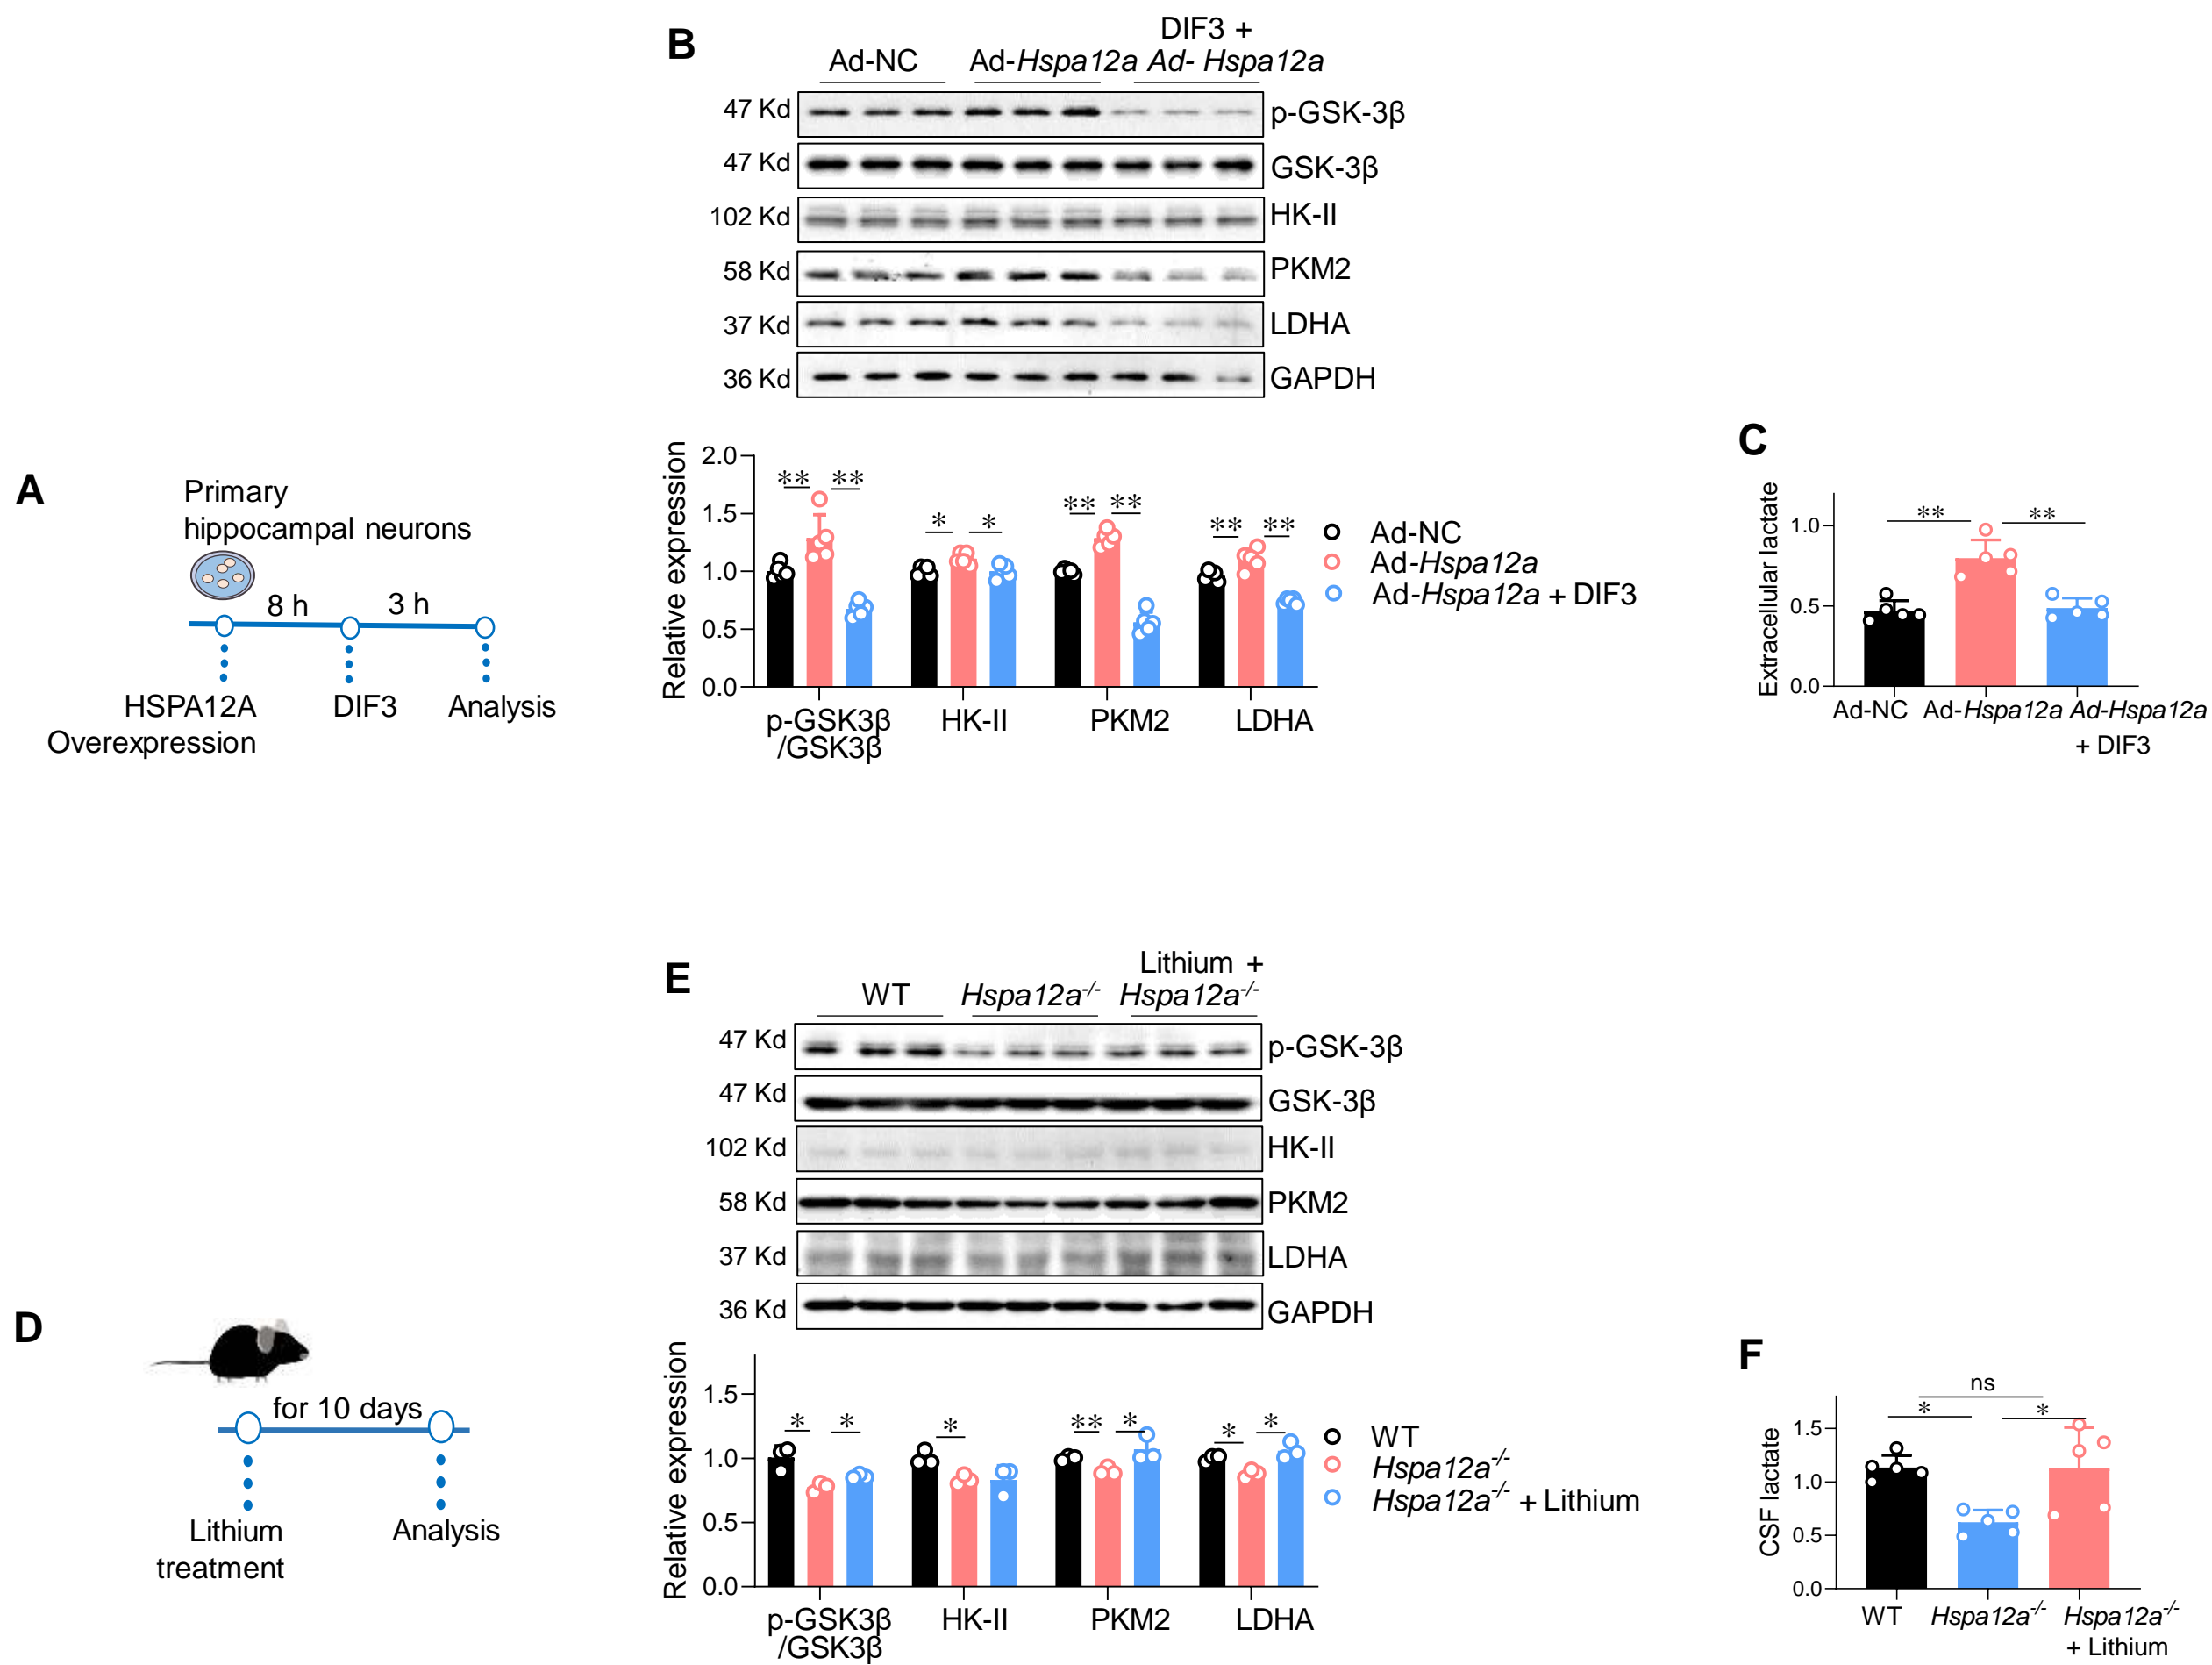

Figure S9

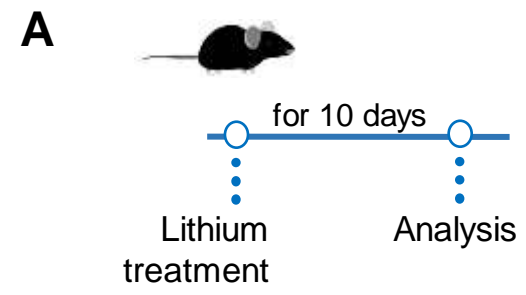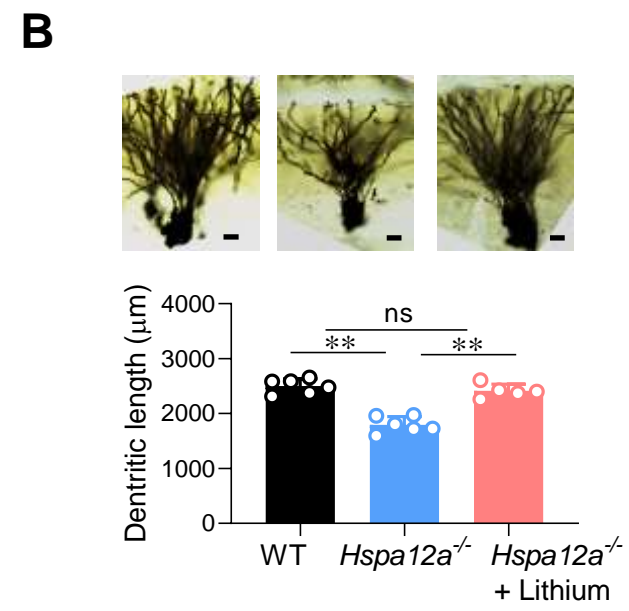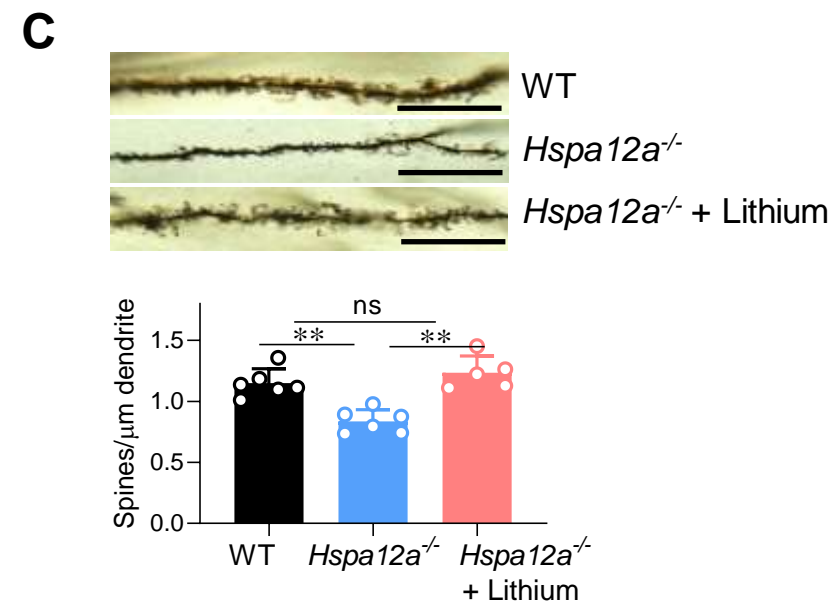

**Figure S10**

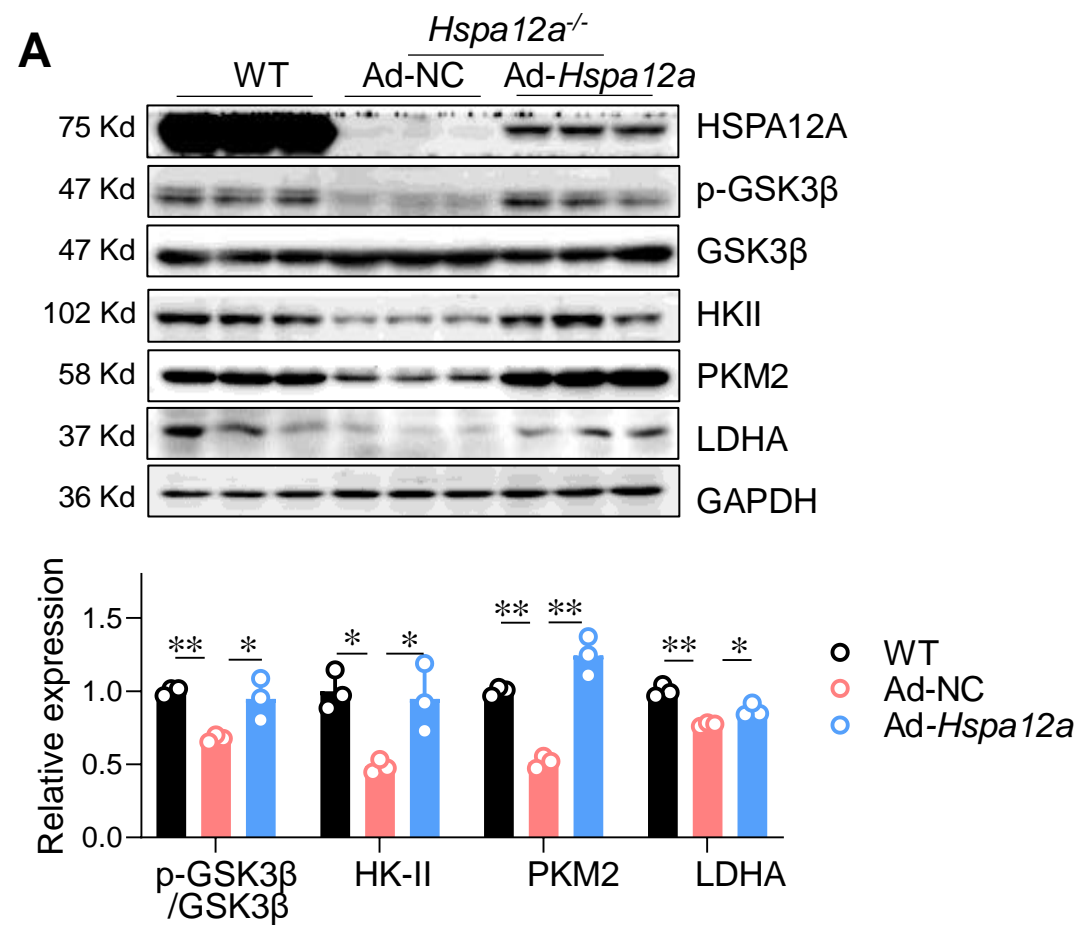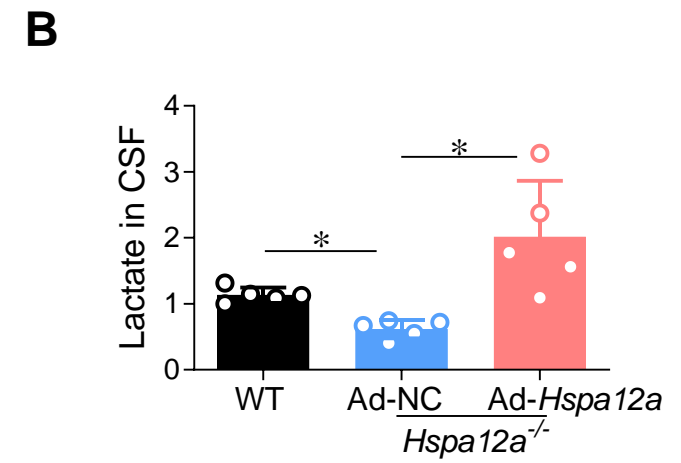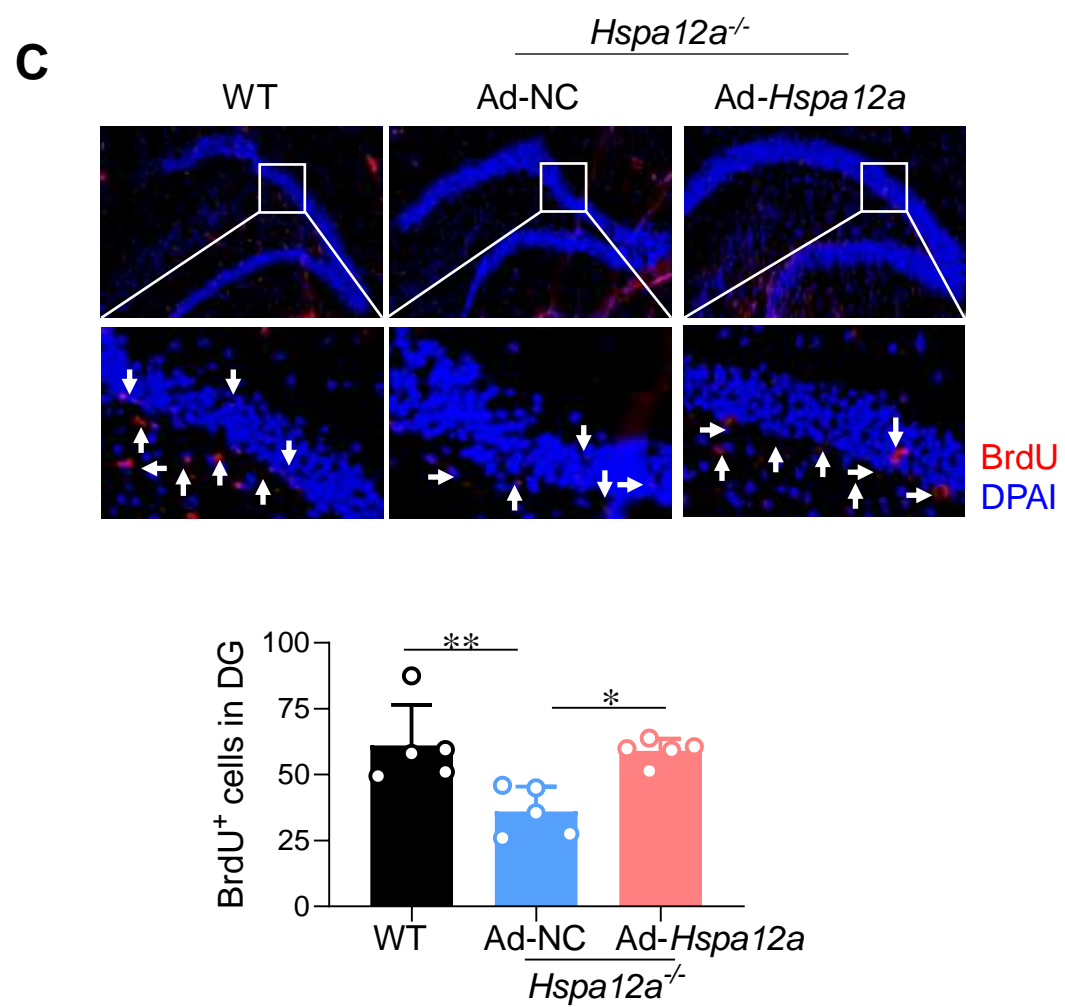

**Figure S11**

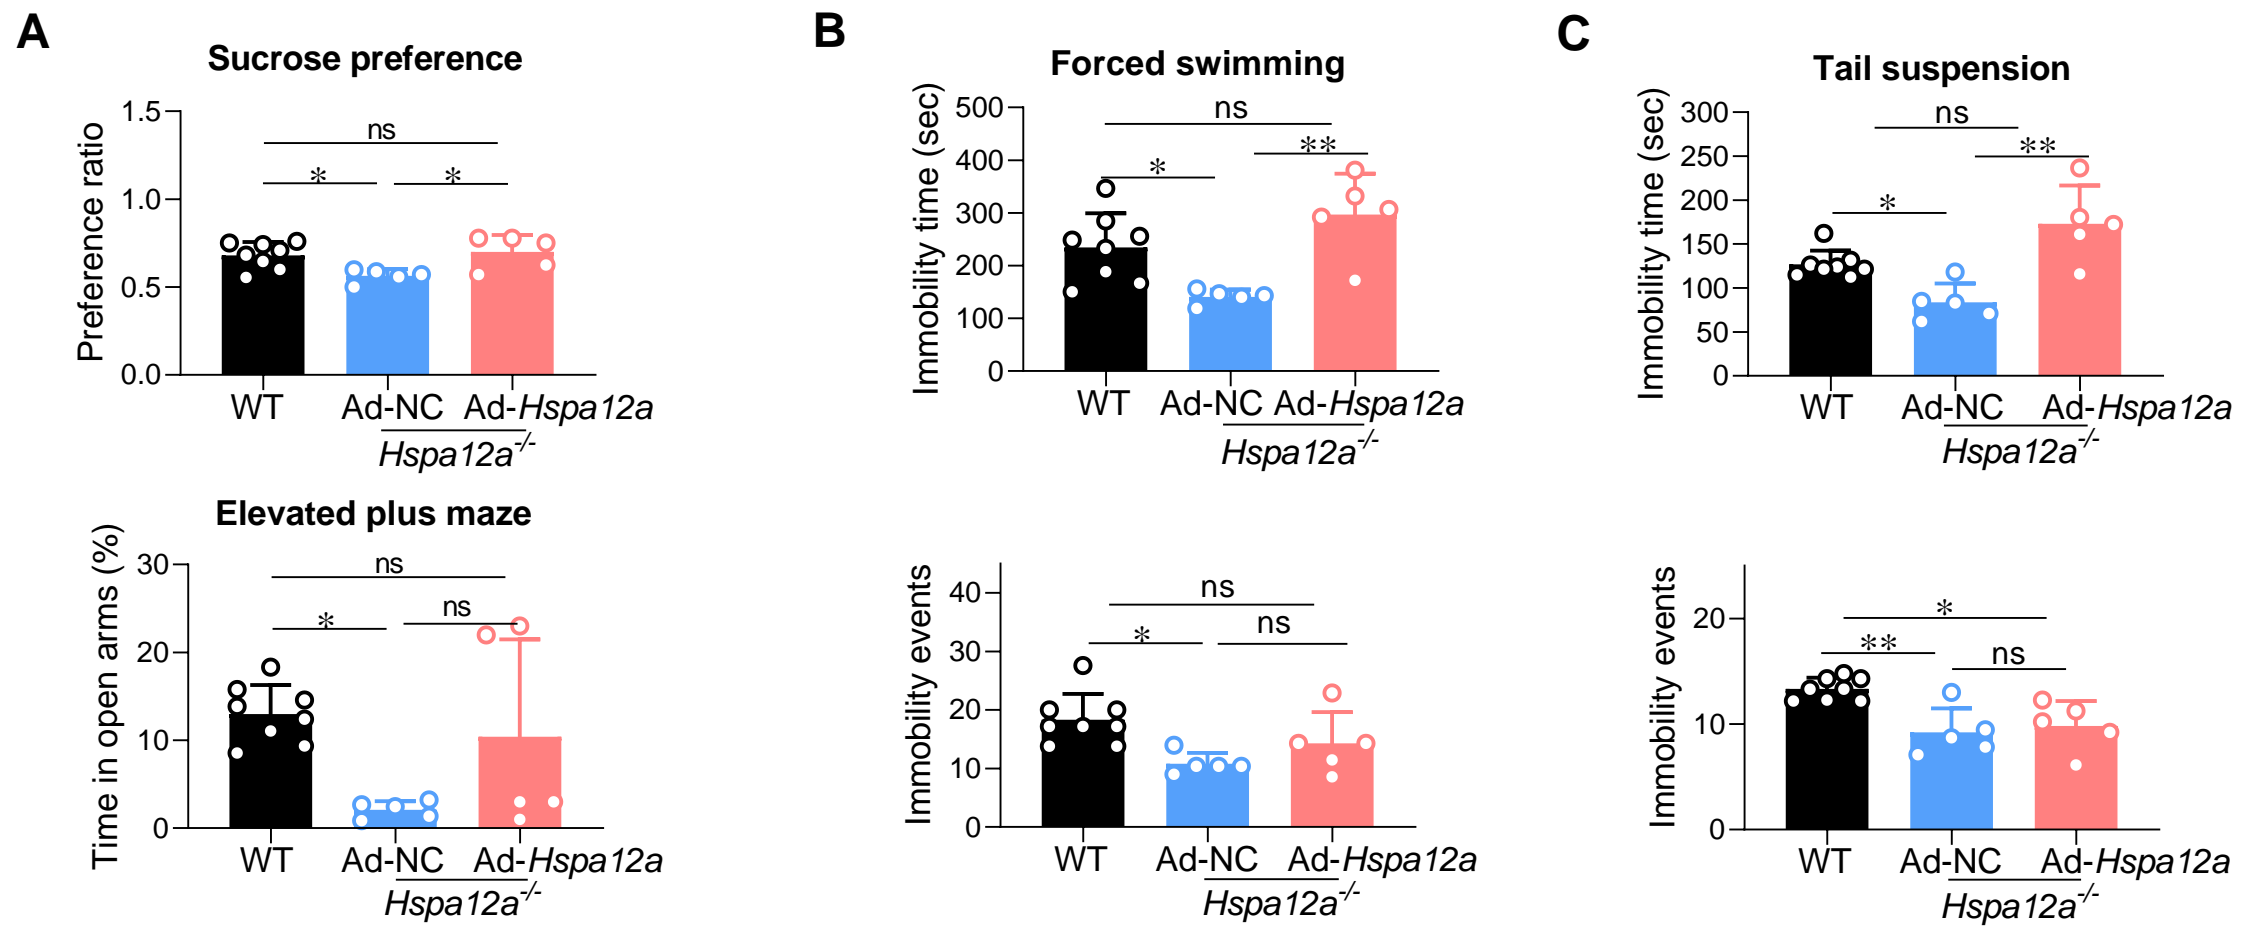

**Figure S12**
