# Supplementary material for: HSPA12A controls cerebral lactate homeostasis to maintain hippocampal neurogenesis and mood stabilization
Source: PubMed Central journal article supplement (PMC10425330; doi:10.1038/s41398-023-02573-5), 2023-08-14
Supplement: 41398_2023_2573_MOESM4_ESM.pdf [file 41398_2023_2573_MOESM4_ESM.pdf]

## Supplemental tables

**Table S1. Antibodies used in the experiments**

| Antibody                            | Source | Company                   | Catalog No. |
|-------------------------------------|--------|---------------------------|-------------|
| anti-HSPA12A                        | Rabbit | Abcam                     | ab200838    |
| anti-GLUT4                          | Rabbit | Abcam                     | ab33780     |
| anti-LDHA                           | Rabbit | Abcam                     | ab101562    |
| anti-PKM2                           | Rabbit | Abcam                     | ab38237     |
| anti-GADPH                          | Rabbit | Bioworld                  | AP0063      |
| anti-GLUT1                          | Rabbit | Proteintech               | 21829-1-AP  |
| anti-HK II                          | Rabbit | Cell Signaling Technology | #2867       |
| anti- PFKFB3                        | Rabbit | Cell Signaling Technology | #13123      |
| anti- GSK3 $\beta$                  | Rabbit | Cell Signaling Technology | 9315S       |
| anti- phosphor-GSK-3 $\beta$ (Ser9) | Rabbit | Cell Signaling Technology | 9336S       |
| Anti- $\beta$ -catenin              | Rabbit | Cell Signaling Technology | 9562S       |
| anti- phosphor- $\beta$ -catenin    | Rabbit | Cell Signaling Technology | 9561S*2     |
| anti- BDNF                          | Mouse  | Proteintech               | 66292-1-Ig  |
| anti- BrdU                          | Mouse  | Proteintech               | 66241-1-Ig  |
| anti- MCT4                          | Rabbit | Proteintech               | 22787-1-Ap  |
| anti- $\beta$ -tubulin III          | Rabbit | Bioworld                  | AP0064      |
| anti- NeuN                          | Rabbit | Millipore                 | ABN78       |
